# Supplementary material for: AL360181.1 promotes proliferation and invasion in colon cancer and is one of ten m6A-related lncRNAs that predict overall survival
Source: PeerJ journal article supplement (doi:10.7717/peerj.16123), 2023-11-08

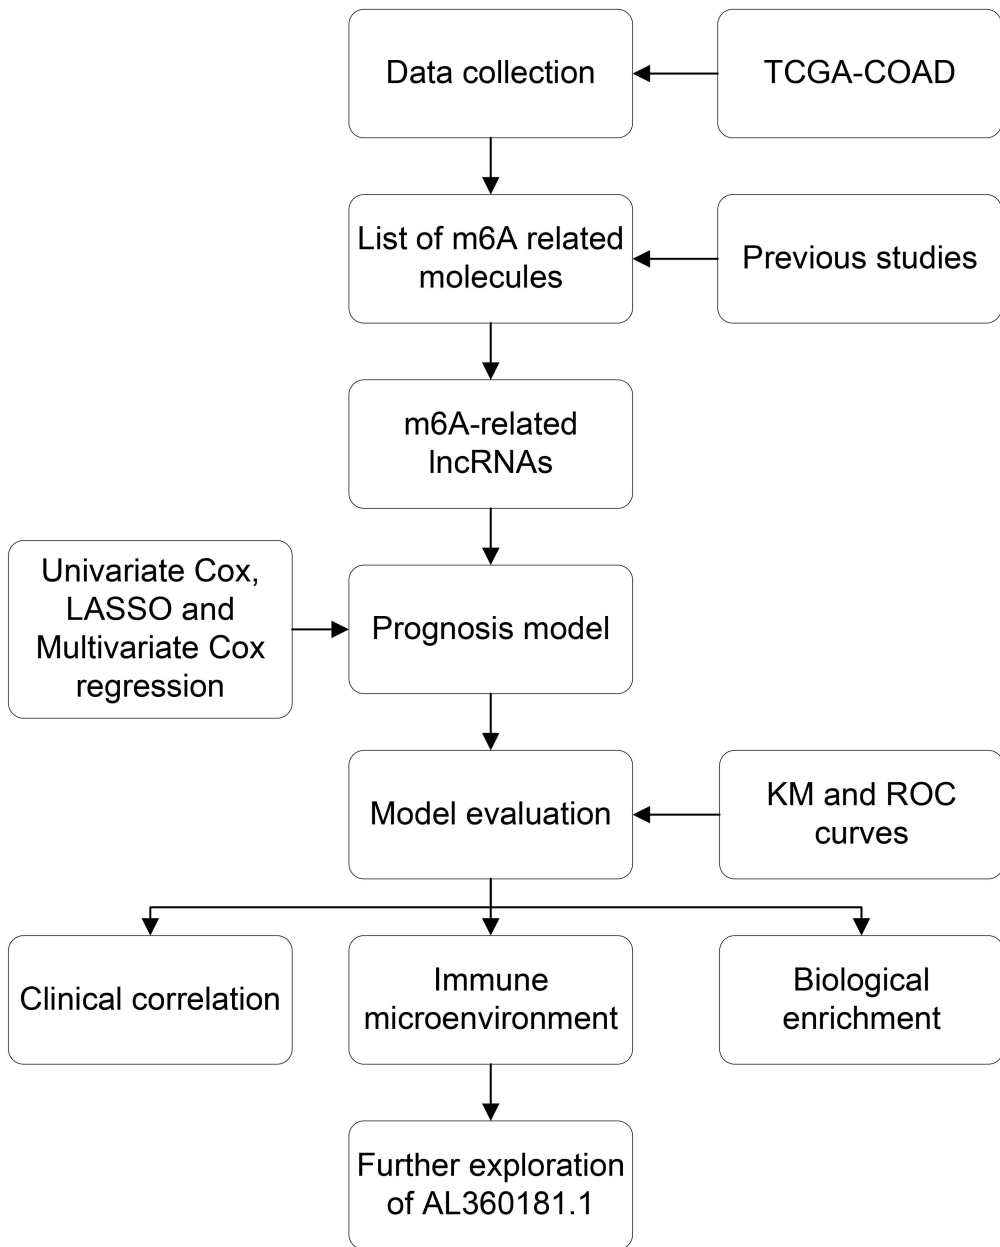

Supplement: Figure_S1.pdf [file Figure_S1.pdf]
